# Supplementary material for: Beneficial effects of benznidazole in Chagas disease: NIH SaMi-Trop cohort study
Source: PLoS Negl Trop Dis. 2018 Nov 1;12(11):e0006814. doi: 10.1371/journal.pntd.0006814 (PMC6211620; doi:10.1371/journal.pntd.0006814)
Supplement: S1 Supporting Information — (PDF) [file pntd.0006814.s001.pdf]

## SAMI TROP PROJECT

## "Markers of prognostic in cronic Chagas cardiopathy"

## Questionnaire I - Visit

University of São Paulo – Medical Tropical Institute  
Telehealth Program: Federal University of Minas Gerais.

**1.) City** \_\_\_\_\_

**2.) Date of interview:** [][]/[][]/[][][][]  
(day/month/year)

**3.)Interviewer's ID number (RG)::** [ ][ ][ ][ ][ ][ ][ ][ ][ ]

**3.a) Interviewer's Name:**

[ ] [ ] [ ] [ ] [ ] [ ] [ ] [ ] [ ] [ ] [ ] [ ] [ ] [ ] [ ] [ ] [ ] [ ]  
 [ ] [ ] [ ] [ ] [ ] [ ] [ ] [ ] [ ] [ ] [ ] [ ] [ ]

### **Tópico I- Demographic information:**

**1.) Study ID:** [ ][ ][ ][ ][ ][ ][ ][ ][ ][ ][ ][ ][ ][ ][ ]

**2.) Age:** [ ][ ][ ](years)

**3.) Sex:** ☐ Male ☐ Female

**4.) Date of Birth:** [ ][ ]/[ ][ ]/[ ][ ][ ][ ]

**5.) Place of birth – City:**

[ ][ ][ ][ ][ ][ ][ ][ ][ ][ ][ ][ ][ ][ ][ ][ ]

[ ][ ][ ][ ][ ][ ][ ][ ][ ][ ][ ][ ][ ][ ][ ][ ][ ][ ][ ]

**6.) State of Birth :**     [ ][ ]

[ ][ ][ ][ ][ ][ ][ ][ ][ ][ ][ ][ ][ ][ ][ ][ ]

[ ][ ][ ][ ][ ][ ][ ][ ][ ][ ][ ][ ][ ][ ][ ][ ]

## Topic II – Subject characteristics

**Now we are going to ask you some general questions:**

## 1.) What is your color?

- ☐ Caucasian  
☐ Black  
☐ Yellow (Asian)  
☐ Mulatto  
☒ Indian  
☐ Refused to answer

## 2.) What is your educational level?

- ☐ Adult alphabetizing  
☐ Never been to school  
☐ I have been to school but I did not complete Elementary school  
☐ Elementary school  
☐ High school  
☐ College or technical school  
☐ Graduate school  
☐ Master degree  
☐ Doctor degree  
☐ Refused to answer

**3.) What is your total family income? R\$ \_\_\_\_\_,00.**

**(Must be included all monthly income of all people that live in the same house of the participant)**

- ☐ Refused to answer                  ☐ I do not know

**3.a) How many people live in your house including you?**

---

## FOR ALL PARTICIPANTS

## Topic III- Lifestyle and Health

Now we are going to ask you some questions about your lifestyle and your current health. Please answer each question as completely as possible.

**4.) Which of the following statements best describes your use of cigarettes?**

- ☐ Never smoked (Skip to question 18)
- ☐ Used to smoke but don't anymore
- ☐ Currently smoke cigarettes
- ☐ Refused to answer

**5.) If you currently smoke or when you used to smoke:**

- ☐ Smoked no more than 100 cigarettes in my entire life
- ☐ Smoked some days, but not every day
- ☐ Smoked less than a pack of cigarettes every day
- ☐ Smoked about one to two packs of cigarettes every day
- ☐ Smoked at least two packs of cigarettes every day
- ☐ Refused to answer

**6.) How many times in the last 30 days have you drunk?**

- [\_\_] Every day or almost every day  
[\_\_] 3 to 5 times a week  
[\_\_] 1 to 2 times a week  
[\_\_] Less than one time a week  
[\_\_] Didn't drink in the last 30 days (skip to question 20)  
[\_\_] Refused to answer

**7.) How many drinks, in average, do you use to drink?**

(Obs: a drink is equal to a dose of distilled drink, a glass of beer or a glass of wine)

- ☐ 1 to 2  
☐ 3 to 5  
☐ more than 5 less than 10  
☐ more than 10  
☐ Don't Know  
☐ Refused to answer

**Physical Activity**

**8.) Do you participate in exercise or any physical activity where you exert yourself, such as sport? (eg.: football, tennis, running, swimming, etc..)**

☐ Yes

☐ No (go to question 23)

☐ Refused to answer

**8.a) How many days per week do you exercise or practice this activities)?**

☐ 1 time per week

☐ 2 to 3 times per week

☐ 4 to 6 times per week

☐ Every day

☐ Refused to answer

**8.b) How long does this activity take each time you do it?**

☐ Less than 15 minutes

☐ 15 to 30 minutes

☐ 30 minutes to 1 hour

☐ 1 hour to 2 hours

☐ More than 2 hours

☐ Refused to answer

**9.) Are you able to do the following each of the following physical activities:**

**9.1) Can you walk down a flight of 8 steps or more without stopping?**

☐ Yes

☐ No

(If Yes go to 9.2, if No go to 9.4)

**9.2a) Can you carry anything up a flight of 8 steps or more without stopping?**

☐ Yes

☐ No

**9.2b) Can you have sexual intercourse without stopping?**

☐ Yes

☐ No

☐ Refused to answer

**9.2c) Can you do outdoor work such as garden, rake, or weed?**

☐ Yes  
☐ No

### 9.2d) Can you slow dance?

☐ Yes  
☐ No

**9.2e) Can you walk at a normal pace on level ground?**

☐ Yes  
☐ No

(If Yes to any 9.2 question go to 9.3, if No go to question 10)

**9.3a) Can you carry at least 11 kilograms (24 pounds) up a flight of 8 steps or more without stopping?**

☐ Yes  
☐ No

**9.3b) Can you lift objects that weigh at least 36 kilograms (80 pounds)?**

[ ] Yes  
[ ] No

**9.3c) Can you do outdoor work such as shovel or spade dirt?**

☐ Yes  
☐ No

**9.3d) Can you do recreational activities such as soccer, basketball or volleyball?**

☐ Yes  
☐ No

**9.3e) Can you walk at a face pace or jog slowly on level ground?**

[ ] Yes  
[ ] No

(Go to question 10)

**9.4a) Can you stand and take a shower without stopping or sitting down?**

☐ Yes

☐ No

### 9.4b) Can you change the sheets or remake a bed?

☐ Yes

☐ No

**9.4c) Can you hang washed clothes out to dry?**

☐ Yes

☐ No

#### 9.4d) Can you clean windows, or mop floors?

☐ Yes

☐ No

(If No to any 9.4 question go to 9.5, if Yes for all the 9.4 questions go to question 10)

**10.5) Can you dress yourself alone without stopping or receiving help?**

☒ Yes

☐ No

**11.) How do you feel physically when performing any of the following physical activities: climbing stairs, sweeping the sidewalk or home, car washing or other activities such as these?**

[\_\_] Do not feel fatigue, shortness of breath on exertion and palpitation;

[\_\_] I feel sometimes, fatigue, shortness of breath on exertion and palpitation, but if I stop to rest or stop the activity, everything returns to normal;

[\_\_] I feel good when at rest, but when doing any physical activity I feel shortness of breath on exertion, fatigue or palpitations;

[\_\_] I'm uncomfortable even at rest and any physical activity makes me feel worse of shortness of breath on exertion, fatigue or palpitations.

**12.) Use these codes to answer the following questions:**

FOR THE INTERVIEW: SHOW TO THE PARTICIPANT THE RESPONSE CARD NUMBER 1

**0 = I am not able to do**

**1 = I am able to do without help**

**2 = I am able to do with someone helping me**

**9 = I do not want to answer**

[\_\_] Are you able to perform heavy work in your home, such as: sweep across the yard, wash windows, wash bathrooms?

[\_\_] Are you able to go up and down two flights of stairs without help?

[\_\_] Are you able to walk one kilometer without getting tired? (10 blocks)

[\_\_] Would you be able to do all the housework alone? Do all washing and cleaning?

[\_\_] Could you cook?

[\_\_] Would you be able to shop at the market and supermarket?

#### **Topic IV - ANAMNESIS (Basic Medical History)**

**13.) Have you been told by a doctor or health professional that you have high cholesterol or cholesterol problems?**

[\_\_] Yes

[\_\_] No (Skip to question 27)

[\_\_] Don't Know

[\_\_] Refused to answer

**14.) If yes, have you been under medical treatment (taking medicine) for high cholesterol?**

[\_\_] Yes

[\_\_] No

[\_\_] Don't Know

[\_\_] Refused to answer

**15.) Have you been told by a doctor or health professional that you have tegumentar or visceral leishmaniasis, generally known as KALAZAR?**

- ☐ Yes  
☐ No (go to question 16)  
☐ Don't Know  
☐ Refused to answer

**15.a) If YES, how long did you have this disease?**

\_\_\_\_\_ Months/Years (mark the correct option according the time the patient informed)

**16.) Have you been told by a doctor or health professional that you have Chagas disease?**

- ☐ Yes  
☐ No  
☐ Don't know  
☐ Refused to answer

**16.a) If YES, how long have ago were you diagnosed with Chagas disease?**

- ☐ Less than 1 year  
☐ 1 to 5 years  
☐ 5 to 10 years  
☐ More than 10 years ago  
☐ Don't know  
☐ Refused to answer

**17.) Are you under medical care for Chagas disease at this time?**

- ☐ Yes  
☐ No  
☐ Don't know  
☐ Refused to answer

**17.a) If YES, can you tell us where?**

- [\_\_] In this Health Unit (the same Unit Health where the interview is  
been conducted)  
[\_\_] Another place  
[\_\_] Refused to answer

**17.b) Name of place** \_\_\_\_\_

**TOPIC V. TREATMENT****18.) Have you ever take the medicine called ROCHAGAN OR BENZONIDAZOL?**

- ☐ Yes  
☐ No (go to question 25)  
☐ Don't know  
☐ Refused to answer

If YES, please answer the following questions.

**19.) How long ago did you take this medicine for the FIRST TIME?**

- ☐ days (go to question 20)  
☐ months (go to question 20)  
☐ years (go to question 20)  
☐ I do not know (go to question 20)  
☐ Refused to answer (go to question 20)  
☐ I am taking this medicine actually (go to question 19a.)

**19.a) I have been taking this medicine since \_\_\_\_/\_\_\_\_/\_\_\_\_.**

**20.) What was the duration of your first treatment?**

- ☐ days  
☐ months  
☐ years  
☐ I do not know  
☐ Refused to answer (go to question 21)

**21.) What was the dose of the first treatment?**

FOR THE INTERVIEWER: We need to know this information as detailed as possible. If the patient knows the number of tablets and the dose in milligrams, fill up both information.

- ☐ tablets per day  
☐ mg per day  
☐ I do not know  
☐ Refused to answer

**22.) How long after the diagnostic did you take this medicine?**

Patient's Initials: [ ][ ][ ][ ][ ][ ][ ][ ][ ][ ][ ][ ][ ][ ][ ][ ]

- ☐ Immediately or less than one month
- ☐ months
- ☐ years
- ☐ I do not know
- ☐ Refused to answer

**23.) Did you take this medicine more than one time?**

FOR THE INTERVIEWER: THIS QUESTION REFERS TO ANOTHER TREATMENT BESIDES THE FIRST ONE.

- ☐ Yes
- ☐ No (go to question 24b)
- ☐ Don't know
- ☐ Refused to answer

**24.a) If YES, how many times did you take this medicine?**

\_\_\_\_\_ times.

**24.b) When was the last time that you took this medicine?**

- ☐ months ago
- ☐ years ago
- ☐ I do not know
- ☐ refused to answer

**25.) Have you ever taken the medicine called AMIODARONE or ATLANSIL?**

- ☐ Yes
- ☐ No (go to question 28)
- ☐ Don't know
- ☐ Refused to answer (go to question 28)

If YES, please answer the following questions.

**26.) How long did you take this medicine?**

- ☐ days
- ☐ months
- ☐ years
- ☐ I do not know (go to question 27)

[\_\_] Refused to answer (go to question 27)

**27.) What was the dose of this medicine that you took?**

FOR THE INTERVIEWER: We need to know this information as detailed as possible. If the patient knows the number of tablets and the dose in milligrams, fill both information.

☐ tablets per day  
☐ mg per day  
☐ I do not know  
☐ Refused to answer

**28.) Have you been told by a doctor or health professional that you have some of these health problems listed below?**

|                              |                                                        |
|------------------------------|--------------------------------------------------------|
| CODES                        | 1=Yes<br>2=No<br>3=do not know<br>4= Refused to answer |
| Diabetes                     |                                                        |
| Kidney problems              |                                                        |
| Problems with blood clotting |                                                        |
| Myocardial infarction        |                                                        |
| High blood pressure          |                                                        |
| Thyroid disease              |                                                        |

**29.) Identify from the below signs or symptoms the one or ones you have or have had:**

|                                                                                                                                          | YES | NO |
|------------------------------------------------------------------------------------------------------------------------------------------|-----|----|
| 29.a) Do you feel pain when you swallow food?                                                                                            |     |    |
| 29.b) Do you have trouble swallowing or have the sensation of "food grasping" in your esophagus?                                         |     |    |
| 29.c) Has a doctor, based on a chest X-Ray, told you that you have a big esophagus?                                                      |     |    |
| 29.d) Is it usual for you to have no bowel movement for 3 or more days? How many times has this happened to you in the last month? _____ |     |    |
| 29.e) Has a doctor, based on a abdominal X-Ray, told you that you have a big colon?                                                      |     |    |

|                                                                                                               |  |  |
|---------------------------------------------------------------------------------------------------------------|--|--|
| 29.f) Do you feel unable to climb 2 flights of stairs without resting?                                        |  |  |
| 29.g) Do you have heart palpitations?                                                                         |  |  |
| 29.h) Do you have difficulty breathing when lying down?                                                       |  |  |
| 29.i) Have you ever felt prolonged faintness or dizzy?                                                        |  |  |
| 29.j) Have you experienced swelling or puffiness in your feet in the morning?                                 |  |  |
| 29.k) Does your heartbeat sometimes race when resting?                                                        |  |  |
| 29.l) Have you noticed any visible neck veins in the mirror when standing up or sitting?                      |  |  |
| 29.m) Has your doctor told you that you have heart abnormalities or rhythm problems on electrocardiogram?     |  |  |
| 29.n). Have you been told that your heartbeat is not regular?                                                 |  |  |
| 28.o) Do you have permanent pace maker insertion?                                                             |  |  |
| 29.p) Have you ever noticed your heartbeat racing or beating abnormally?                                      |  |  |
| 29.q) Have you ever awakened during the night short breathed or not being able to breath?                     |  |  |
| 29.r) Do you feel short breath when you have to use physical strength, for example: climbing stairs or hills? |  |  |

**30.) Do you take any of these drugs?**

| Medicine          | YES | NO | Time of use (years) |
|-------------------|-----|----|---------------------|
| Digoxina          |     |    |                     |
| Furosemida        |     |    |                     |
| Hidroclorotiazida |     |    |                     |
| Captopril         |     |    |                     |
| Enalapril         |     |    |                     |
| Losartan          |     |    |                     |
| Espironolactona   |     |    |                     |
| Carvedilol        |     |    |                     |

|                                         |  |  |  |
|-----------------------------------------|--|--|--|
| Hydralazine                             |  |  |  |
| Mononitrato de<br>isosorbide amlodipina |  |  |  |
| Warfarin                                |  |  |  |
| AAS                                     |  |  |  |
| Atenolol                                |  |  |  |
| Propanolol                              |  |  |  |

**31.) Have you ever had or have fainting or loss of consciousness?**

- ☐ Yes  
☐ No (go to question 32)  
☐ I do not know  
☐ Refused to answer

**31.a) If YES, how many times it happened in the last two years?**

- ☐☐☐ times  
☐ I do not remember  
☐ Refused to answer

**31.b) Do you remember how long in average did each episode take?**

- minutes  
☐ I do not remember  
☐ Refused to answer

**32.) Do you monitor your health in another service for other medical illness?**

- ☐ Yes, just once  
☐ Yes, more than one time  
☐ No  
☐ Refused to answer

**33.) How do you rate your health condition today?**

- ☐ Very good  
☐ Good  
☐ Average  
☐ Bad  
☐ Very bad  
☐ I do not know  
☐ Refused to answer

**34.) Besides you, someone else in your family has or had Chagas disease?**

☒ Yes

☐ No

☐ I do not know

☐ Refused to answer

**34.a) If yes, what degree of kinship** (father, mother, brother, sister, uncle, aunt, etc.): \_\_\_\_\_

**Thank you for participating in this International Research Project. Be sure that you are contributing to improve knowledge about Chagas Disease and quality of care provided to patients.**

### 35.) Quality of life. WHOQOL-Bref.

FOR THE INTERVIEWER: This module is based on subjective perception of patient. Only he/she can answer these question
